1 **Brain DNA Methylation Patterns in *CLDN5* Associated With Cognitive Decline**

2

3 Anke Hüls, PhD<sup>1</sup>, Chloe Robins, PhD<sup>2</sup>, Karen N. Conneely, PhD<sup>1</sup>, Rachel Edgar, BSc<sup>3</sup>, Philip

4 L. De Jager, MD, PhD<sup>4,5</sup>, David A. Bennett, MD<sup>6</sup>, Aliza P. Wingo, MD<sup>7,8</sup>, Michael P.

5 Epstein, PhD<sup>1</sup>, Thomas S. Wingo, MD<sup>1,2</sup>

6

7 <sup>1</sup> Department of Human Genetics, Emory University, Atlanta, Georgia, USA

8 <sup>2</sup> Department of Neurology, Emory University School of Medicine, Atlanta, GA, US

9 <sup>3</sup> Centre for Molecular Medicine and Therapeutics, BC Children's Hospital Research Institute,  
10 and Department of Medical Genetics, University of British Columbia, Vancouver, British  
11 Columbia, Canada

12 <sup>4</sup> Cell Circuits Program, Broad Institute, Cambridge, MA, USA

13 <sup>5</sup> Center for Translational and Computational Neuroimmunology, Department of Neurology,  
14 Columbia University Medical Center, New York, NY, USA

15 <sup>6</sup> Rush Alzheimer's Disease Center, Rush University Medical Center, Chicago, Illinois, USA

16 <sup>7</sup> Division of Mental Health, Atlanta VA Medical Center, Decatur, GA, USA

17 <sup>8</sup> Department of Psychiatry, Emory University School of Medicine, Atlanta, GA, US

18 **Corresponding authors:**

19

20 Aliza P. Wingo, M.D., M.Sc.

21 Atlanta VA Medical Center

22 1670 Clairmont Road, Decatur GA 30033

23 E-mail: [Aliza.wingo@emory.edu](mailto:Aliza.wingo@emory.edu)

24

25 Michael P. Epstein, Ph.D.

26 305L Whitehead Building

27 615 Michael Street NE

28 Atlanta, GA 30322-1047

29 Email: [mpepste@emory.edu](mailto:mpepste@emory.edu)

30

31 Thomas S. Wingo, M.D.

32 505K Whitehead Building

33 615 Michael Street NE

34 Atlanta, GA 30322-1047

35 Email: [Thomas.wingo@emory.edu](mailto:Thomas.wingo@emory.edu)

36

37

38

39 **Funding:**

40 AH received a research fellowship from the Deutsche Forschungsgemeinschaft (DFG; HU

41 2731/1-1). MPE was supported by NIH grant R01 GM117946. APW is supported by NIH

42 grants R01 AG056533, VA I01 BX003853, and NIH U01 MH115484. TSW was supported

43 by NIH grants P50 AG025688, R56 AG062256, R56 AG060757, and R01 AG056533. CR

44 was supported by NIH grant T32 NS007480. DAB was supported by P30AG10161,

45 R01AG15819, R01AG17917, R01AG36042, U01AG61356. The funders had no role in the

46 study design, data collection and analysis, decision to publish, or preparation of manuscript.

47

48 **Abstract**

49 Objective: Cognitive decline is a hallmark of dementia; however, the brain epigenetic  
50 signature of cognitive decline is unclear. We investigated the associations between brain  
51 tissue-based DNA methylation and cognitive trajectory.

52 Methods: We performed a brain epigenome-wide association study of cognitive trajectory in  
53 636 participants from the Religious Order Study and the Rush Memory and Aging Project  
54 (ROS/MAP) using DNA methylation profiles of the dorsal lateral prefrontal cortex (dPFC).  
55 To maximize our power to detect epigenetic associations, we used the recently developed  
56 Gene Association with Multiple Traits (GAMuT) test to analyze the five measured cognitive  
57 domains simultaneously.

58 Results: We found an epigenome-wide association for differential methylation of sites in the  
59 Claudin-5 (*CLDN5*) locus and cognitive trajectory (p-value =  $9.96 \times 10^{-7}$ ), which was robust  
60 to adjustment for cell type proportions (p-value =  $8.52 \times 10^{-7}$ ). This association was primarily  
61 driven by association with declines in episodic (p-value =  $4.65 \times 10^{-6}$ ) and working memory  
62 (p-value =  $2.54 \times 10^{-7}$ ). This association between methylation in *CLDN5* and cognitive  
63 decline was independent of beta-amyloid and neurofibrillary tangle pathology and present in  
64 participants with low levels of neuropathology. In addition, only 13-31% of the association  
65 between methylation and cognitive decline was mediated through levels of neuropathology,  
66 whereas the major part of the association was independent of it.

67 Interpretation: We identified methylation in *CLDN5* as new epigenetic factor associated with  
68 cognitive trajectory. Higher levels of methylation in *CLDN5* were associated with faster  
69 cognitive decline implicating the blood brain barrier in maintenance of cognitive trajectory.

70

71

## 72 **Introduction**

73 Cognitive decline is a common concern among older adults; however, the trajectory of  
74 cognitive performance with age has a wide range from stable to rapid decline. Cognitive  
75 trajectory is an important predictor of health outcomes and mortality, independent of other  
76 commonly assessed risk factors<sup>1</sup>. Dementia is a common consequence of a decline in  
77 cognition, and Alzheimer Disease (AD) is its leading cause<sup>2</sup>. AD is characterized by the  
78 neuropathological accumulation of neuritic plaques and neurofibrillary tangles, which is  
79 accompanied by neuronal loss<sup>3</sup>; however, most older individuals have several co-occurring  
80 neuropathologies. Collectively, neuropathologies explain about 40% of the variance in  
81 cognitive trajectory, leaving most unexplained<sup>4,5</sup>. Thus, cognitive trajectory may be  
82 considered a summation of the different neuropathological and biological processes  
83 independent of pathologies at work in the aging human brain<sup>5-7</sup>.

84 Despite the importance of understanding cognitive trajectory, existing epigenetic work  
85 on DNA methylation levels measured in brain tissue has primarily focused on AD-specific  
86 pathologies<sup>8-11</sup> and clinical diagnosis of AD<sup>12-14</sup>. In contrast, epigenetic studies that focused  
87 on examining cognitive decline were limited due to measuring DNA methylation changes in  
88 blood<sup>15</sup>, which showed only moderate correlations (~0.4) with brain methylation<sup>15</sup>. Thus,  
89 there is need to understand the epigenetic changes that are associated with cognitive trajectory  
90 to identify potential mechanisms that may act through or independent of known  
91 neuropathologies.

92 In this study, we investigated the associations between brain tissue-based DNA  
93 methylation and cognitive trajectory in 636 participants from the Religious Order Study and  
94 Rush Memory and Aging Project (ROS/MAP) cohorts. Cognitive trajectory was assessed in  
95 five cognitive domains (episodic memory, perceptual speed, perceptual orientation, semantic  
96 memory, and working memory), which were analyzed simultaneously by using an innovative

97 kernel procedure that allows to investigate associations between multiple predictors (e.g.  
98 methylation sites in a gene) with multiple outcomes (e.g. multiple cognitive domains)<sup>16,17</sup>.

99 Findings were validated in independent post-mortem frontal cortex samples<sup>10</sup>, and their  
100 biological plausibility were evaluated using gene expression and genotype data.

101

## 102 ***Methods***

### 103 *Study design and study population*

104 The discovery dataset included deceased subjects from two large, prospectively  
105 followed cohorts recruited by investigators at Rush Alzheimer's Disease Center in Chicago,  
106 IL: The Religious Orders Study (ROS) and the Rush Memory and Aging Project (MAP)<sup>11,18</sup>.

107 Both ROS and MAP collect detailed annual cognitive and clinical evaluations, and brain  
108 autopsy. Participants provided informed consent, an Anatomic Gift Act for organ donation,  
109 and a repository consent to allow their data to be repurposed. Both studies were approved by  
110 an Institutional Review Board of Rush University Medical Center. To be included in the  
111 present study, participants must have at least two follow-up evaluations, and available  
112 methylation data derived from dorsolateral prefrontal cortex. As in previous publications, the  
113 ROS and MAP data were analyzed jointly since much of the phenotypic data collected are  
114 identical at the item level in both studies and collected by the same investigative team<sup>11,19</sup>.

115 The replication dataset included samples from the MRC London Neurodegenerative  
116 Disease Brain Bank (GSE59685)<sup>10</sup>.

117

### 118 *DNA methylation*

119 In the discovery dataset, DNA methylation was measured from the dorsolateral  
120 prefrontal cortex (dPFC; Broadman area 46) as previously described in 737 ROS/MAP

121 participant samples<sup>11</sup>, of which 665 had complete phenotype and covariate information. DNA  
122 was extracted from cortically dissected sections of dPFC and DNA methylation was measured  
123 using the Illumina HumanMethylation450 Beadchip array. Initial data processing, including  
124 color channel normalization and background removal, was performed using the Illumina  
125 GenomeStudio software. The raw IDAT files were obtained from Synapse  
126 ([www.synapse.org](http://www.synapse.org); Synapse ID: syn7357283) and the following probes were removed: 1)  
127 probes with a detection p-value > 0.01 in any sample, 2) probes annotated to the X and Y  
128 chromosomes by Illumina, 3) probes that cross-hybridize with other probes due to sequence  
129 similarity (identified by<sup>20</sup>), 3) non-CpG site probes, and 4) probes that overlap with common  
130 SNPs (identified by<sup>21</sup>). After this filtering, the remaining CpG sites were normalized using  
131 the BMIQ algorithm in Watermelon R package<sup>22</sup>, and the ComBat function from the sva R  
132 package was used to adjust for batch effects<sup>23</sup>. CpG sites with a distance of more than 20 KB  
133 to the closest gene were excluded from analysis. After quality control 338,036 discrete CpG  
134 dinucleotides corresponding to 26,558 genes in 636 subjects were used for analysis.

135 In the replication dataset, DNA methylation was derived from prefrontal cortex  
136 obtained from individuals archived in the Medical Research Council (MRC) London  
137 Neurodegenerative Disease Brain Bank. This previously published dataset provided samples  
138 with DNA methylation data measured on the Illumina HumanMethylation450 Beadchip array.  
139 Data was obtained from the Gene Expression Omnibus (GEO; GSE59685)<sup>10</sup>. Similar to above  
140 probes annotated to the X and Y chromosomes, cross-hybridizing probes, non-CpG site  
141 probes and probes that overlap with common SNP were removed. The data downloaded from  
142 GEO was already normalized using the dasen algorithm in Watermelon R package<sup>22</sup> and then  
143 the ComBat function from the sva R package was used to adjust for array ID batch effects<sup>23</sup>.  
144 Neuronal and non-neuronal brain cell-type proportions were estimated and normalized  
145 between PFC samples<sup>24</sup>. CpG sites with a distance of more than 20 KB to the closest gene

146 were excluded from analysis. After quality control 358,515 discrete CpG dinucleotides  
147 corresponding to 27,585 genes in 66 subjects were used for analysis.

148

#### 149 *Genotype data*

150 Genotyping data was generated using two microarrays, Affymetrix GeneChip 6.0  
151 (Affymetrix, Inc, Santa Clara, CA, USA ) and Illumina HumanOmniExpress (Illumina, Inc,  
152 San Diego, CA, USA) as described previously<sup>25</sup>. Genotyping was imputed to the 1000  
153 Genome Project Phase 3 using the Michigan Imputation Server <sup>26</sup>, and the following filtering  
154 criteria were applied minor allele frequency (MAF) > 5%, Hardy-Weinberg p-value >10<sup>-5</sup> and  
155 genotype imputation R<sup>2</sup> > 0.3.

156

#### 157 *Gene expression*

158 RNA extracted from ROS/MAP post-mortem dPFC was sequenced on the Illumina  
159 HiSeq with 101-bp paired-end reads using the strand-specific dUTP method with poly-A  
160 selection with a coverage of 50 million reads. BAM files were converted to FASTQ format  
161 using Picard, followed by alignment of reads to GRCh38 reference genome using STAR<sup>27</sup>.  
162 Gene level counts were computed using STAR<sup>27</sup>. Genes with < 1 count per million in at least  
163 50% of the samples and with missing length and percent GC content were removed.  
164 Additionally, two outlier samples were removed. After quality control, counts were  
165 normalized using variance stabilization transformation, which performed log<sub>2</sub> transformation  
166 of the counts, normalizes for library size, and transforms the counts to approximately  
167 homoscedastic <sup>28</sup>. Then the candidate mRNAs were extracted for association analysis with  
168 rate of cognitive decline adjusting for sex, age at death, RIN, PMI, RNA-sequencing batch,  
169 and cell type composition. Proportions of neurons, astrocytes, oligodendrocytes, and

170 microglia were estimated from RNA-sequencing data using CIBERSORT<sup>29</sup> and cell-type  
171 specific signatures<sup>30</sup>. We used the proportions of cell type to adjust for tissue heterogeneity.  
172 Using the findings of the epigenome-wide association study of cognitive trajectory, we  
173 selected the transcripts corresponding to the associated genes for further analyses after the  
174 aforementioned quality control and variance stabilization transformation.

175

### 176 *Cognitive trajectory*

177 Cognitive trajectory was assessed in five different cognitive domains: episodic  
178 memory, perceptual speed, perceptual orientation, semantic memory, and working memory.  
179 Participants in both studies underwent structured, annual clinical evaluations that included  
180 detailed cognitive and neurologic examinations, as previously reported<sup>31,32</sup>. Scores from  
181 those tests were converted to z-scores using the mean and standard deviation of the cohorts at  
182 baseline. Cognitive scores were modeled longitudinally with a mixed effects model, adjusting  
183 for age, sex and education, providing person-specific random slopes of decline. The random  
184 slope of each subject captures the individual rate of cognitive decline after adjusting for age,  
185 sex and education.

186

### 187 *Neuropathologic Outcomes*

188 We used the CERAD score and Braak staging as neuropathological outcomes in our  
189 analyses. The CERAD score is a semiquantitative measure of neuritic plaque density as  
190 recommended by the Consortium to Establish a Registry for Alzheimer's Disease (CERAD).  
191 A CERAD neuropathological diagnosis of AD requires moderate (probable AD) or frequent  
192 neuritic plaques (definite AD) in one or more neocortical regions. The Braak stage is a  
193 standardized measure of neurofibrillary tangle distribution and burden determined at autopsy



194 with modified Bielschowsky silver stained sections<sup>33</sup>. Braak stages I and II indicate  
195 neurofibrillary tangle confined mainly to the entorhinal region of the brain, Braak stages III  
196 and IV indicate involvement of limbic regions such as the hippocampus and Braak stages V  
197 and VI indicate moderate to severe neocortical involvement.

198

### 199 *Statistical analysis*

200 In our main analysis, we estimated epigenetic associations across five neurocognitive  
201 domains in a gene-based analysis, in which each CpG site was assigned to the closest gene  
202 using the Bioconductor package hiAnnotator<sup>34</sup> and the ensembl gene predictions (ensGene,  
203 version of Apr-06-2014). All CpG sites with a distance of no more than 20 KB to the closest  
204 gene, were included in the analyses. In addition, we conducted a sensitivity analysis in which  
205 we only included CpG sites with a distance of no more than 10 KB to the closest gene. In a  
206 traditional association study of cognitive trajectory, each cognitive test may be either tested  
207 individually<sup>15</sup> or used to estimate a composite measure aggregated across several cognitive  
208 tests<sup>35</sup>. However, these approaches are underpowered in the presence of pleiotropy since they  
209 fail to exploit correlation among domains<sup>17</sup>. Thus, analysis of a single composite measure can  
210 lose power if the causal CpG sites are only associated with a subset of the features that make  
211 the composite measure<sup>17</sup>. Hence, it can be more powerful to directly account for the trait  
212 correlations using kernel methods<sup>36</sup>. Kernel methods quantify the genetic similarity among  
213 pairs of subjects and test whether this genetic similarity is associated with trait similarity.  
214 Thus, they harness potential pleiotropy that exists between traits to improve power to detect  
215 associations. To analyze epigenetic associations across five neurocognitive domains  
216 simultaneously, we applied a variation of the GAMuT test<sup>16</sup> that was adapted to DNA  
217 methylation data. GAMuT is motivated by the idea that individuals with similar epigenetic  
218 patterns should also have similar cognitive traits across the different cognitive domains.

219 Consequently, GAMuT constructs two different similarity matrices; one similarity matrix  
220 including cognitive decline in the five cognitive domains and the other similarity matrix for  
221 the epigenetic variation (beta values of CpG sites) assigned to a gene. Phenotypic and  
222 epigenetic similarity were modelled using linear kernels. P-values for GAMuT were derived  
223 using Davies' exact method, which is a computationally efficient method to provide accurate  
224 p-values in the extreme tails of tests that follow mixtures of chi-square variables<sup>37,38</sup>. To test  
225 which cognitive domains and CpG sites were likely main drivers in our multivariate analysis,  
226 we conducted an association analysis for each domain separately. The gene-based analyses for  
227 the single domains were performed with GAMuT and linear regression analyses were used in  
228 the CpG-based analyses.

229 All association models were adjusted for age at death, education, sex, ancestry,  
230 smoking status and post-mortem interval (PMI). Principal components (PCs) based on CpG  
231 sites chosen for their potential to proxy nearby SNPs (within 10 BP) were used to correct for  
232 population stratification (first three PCs, Figure S1) and cell type heterogeneity<sup>21</sup>. Samples  
233 whose first PC (PC1) deviated more than 3 standard deviations from the mean PC1, were  
234 excluded from analyses, reducing the final sample size from 665 to 636. In a sensitivity  
235 analysis, associations were additionally adjusted for cell type proportions<sup>24</sup>. All analyses were  
236 performed using R (version 3.4.3) using built-in functions unless otherwise specified.

237 We applied a Bonferroni threshold to correct for multiple testing. In the gene-based  
238 GAMuT analysis, the significance threshold was adjusted for the number of tested genes  
239 (threshold:  $0.05/26,558 = 1.88 \times 10^{-6}$ ) and in the CpG-site-based linear regression analyses for  
240 the number of tested CpG sites (threshold:  $0.05/338,036 = 1.48 \times 10^{-7}$ ).

241 Methylation signals associated with cognitive decline were validated using CERAD  
242 and Braak stage as outcomes. In addition, we analyzed whether the association between  
243 methylation and cognitive decline was modified (interaction analysis) or mediated (causal

244 mediation analysis) by neuropathology (CERAD, Braak stage). Causal mediation analysis  
245 from a counterfactual perspective was performed by using the R package “mediation”<sup>39</sup>, an  
246 approach that relies on the quasi-Bayesian Monte Carlo method based on normal  
247 approximation<sup>40</sup>. Using the counterfactual framework allows for definition of direct and  
248 indirect effects and a total effect as the sum of direct and indirect effects. The indirect effect  
249 refers to the effect through the mediator under study. The direct effect refers to the remaining  
250 effect that is not through the mediator<sup>41</sup>. The proportion of the indirect effect in the total  
251 effect was used to assess the extent to which the association between methylation and  
252 cognitive decline was mediated through neuropathology as an intermediate pathway<sup>42</sup>.

253         The replication dataset did only have Braak stage as neurocognitive outcome, which is  
254 strongly associated with cognitive decline<sup>33</sup>. In the replication dataset, associations between  
255 CpG sites within a gene and the Braak stage were tested with GAMuT after correction for age  
256 at death, sex and cell type composition. Due to the small sample size of the replication  
257 dataset, we conducted a permutation test with 10,000 replications in addition to the Davies’  
258 approximation to verify the accuracy of p-values.

259         The biological plausibility of our findings was examined by investigating the  
260 association 1) of DNA methylation with gene expression as well as of gene expression with  
261 cognitive decline and 2) of genotypes with cognitive decline to investigate if our associations  
262 were due to a hidden genotype effect. All of these associations were tested using GAMuT and  
263 the genotype associations were followed by a linear regression analysis on the single SNP  
264 level. Fine-mapping of our epigenome-wide associations was done with coMET<sup>43</sup>, which is a  
265 visualization tool of EWAS results with functional genomic annotations and estimation of co-  
266 methylation patterns.

267

268 **Results**

269 *Description of study participants*

270           There were 636 ROS/MAP participants included in this study with an average age at  
271 death of 86 years and with 63% being female (Table 1). Most of the participants were white  
272 (98%), had a high level of education and 70% had never smoked. On average, cognitive  
273 performance declined with age for every single domain (Table 1) and correlations of cognitive  
274 decline between different domains were moderate, ranging from 0.54 to 0.78 (Table S1).  
275 Cognitive decline was associated with more signs of neuropathology (CERAD and Braak  
276 stage, Table S2).

277           There were 66 MRC Brain Bank participants with an average age at death of 87 years,  
278 with 67% being female and an average Braak stage of 5 (Table 1).

279

280 *Methylation patterns of CLDN5 associated with cognitive decline*

281           In the ROS/MAP participants (discovery dataset), we found that methylated CpG sites  
282 in the Claudin-5 (*CLDN5*) locus were associated with cognitive trajectory (p-value =  $9.96 \times$   
283  $10^{-7}$ ; Figure 1, Table 2, Table S3, and Figure S1). This association was robust to adjustment  
284 for cell type proportions (p-value =  $8.52 \times 10^{-7}$ , Table S4, Figures S2 and S3), to the selection  
285 of a smaller window of CpG sites around each gene (p-value =  $9.96 \times 10^{-7}$ , within 10kb, Table  
286 S5), and to the restriction to participants with European ancestry (621/636 participants, p-  
287 value =  $9.73 \times 10^{-7}$ , Table S6). The trajectories of episodic and working memory were the  
288 main drivers for the observed association with both being associated with CpG sites assigned  
289 to *CLDN5* in the analyses of the single domains (Table 2, Figure S4 and Tables S7-S11).  
290 Genes showing suggestive association with cognitive trajectory (p-values  $< 5 \times 10^{-5}$ ) included  
291 *AC084018.1*, *CTB-186G2.1*, *ATG16L2*, *KCNN4*, *RP11-779O18.1*, *TTC22*, *DCUNID2-AS*,  
292 *PNMA1* and *RP11-101C11.1*. The strongest associations with these genes were found with

293 episodic memory, followed by working memory. Interestingly, most top methylation signals  
294 in Table 2 (*CLDN5* and 7/9 suggestive genes) were also at least nominally associated with  
295 CERAD (Table 3, Figures S5-S6 and Table S12) and Braak stage (Table 3, Figure S7 and  
296 Table S13).

297 To generalize our findings from the ROS/MAP participants, we performed the same  
298 epigenetic analysis in MRC Brain Bank participants with DNA methylation data available  
299 (replication dataset). We tested for differential methylation using Braak stage. Of the 8  
300 methylation signals, which were at least nominally associated with Braak stage in the  
301 discovery dataset, *CLDN5*, *CTB-186G2.1* and *KCNN4* could be replicated in the replication  
302 dataset (Table 3, Table S14, Figure S8).

303

#### 304 *Higher levels of methylation in CLDN5 locus associated with cognitive decline*

305 To identify which CpG sites are the main drivers of the observed associations and to  
306 understand the direction of association, we conducted a linear regression analysis for the  
307 cognitive trajectory of each cognitive domain. Interestingly, except for *PNMA1*, higher levels  
308 of methylation within our top genes were associated with an increased cognitive decline in  
309 every single cognitive domain (Table S15). Within the CpG sites assigned to *CLDN5*,  
310 cg16773741 and cg05460329 were the main drivers of the association with cg16773741 being  
311 associated with episodic memory (p-value =  $1.48 \times 10^{-8}$ ), semantic memory ( $8.81 \times 10^{-8}$ ) and  
312 working memory ( $8.66 \times 10^{-9}$ ) (Table 4). The direction of association with these two CpG  
313 sites was consistent with the association observed for CERAD and Braak stage, which could  
314 further be replicated in the replication dataset (Table S15, N=66).

315

#### 316 *Association with CLDN5 even present without signs of neuropathology*

317 To investigate if the association between methylation in *CLDN5* and cognitive decline  
318 is also present in participants without clear signs of neuropathology, we conducted an analysis  
319 of the interaction between the most significantly associated CpG site (cg16773741) and  
320 CERAD or Braak stage on cognitive decline. The association between methylation in  
321 cg16773741 did not significantly differ between participants with no to little signs of  
322 neuropathology versus participants with moderate to severe signs of neuropathology  
323 (measured by CERAD and Braak stage; Figure 3). Consequently, the association between  
324 methylation in cg16773741 and decline in episodic, semantic, and working memory was even  
325 significant in participants with no or little signs of neuropathology..

326

#### 327 *Partial mediation through neuropathology*

328 The association between DNA methylation in the *CLDN5* locus (cg16773741) and  
329 cognitive trajectory was only partially mediated through an increased neuropathology. It  
330 ranged between 17% (95% confidence interval (CI): 18-40%) to 31% (95% CI: 18-61%) for  
331 CERAD and 13% (95% CI: 7-21%) to 27% (95% CI: 15-41%) for Braak stage depending on  
332 the cognitive domain (Figure 4). Therefore, the major part of the association with *CLDN5* was  
333 a direct association between methylation and cognitive decline, which was independent of  
334 beta-amyloid and neurofibrillary neuropathology.

335

#### 336 *Methylation signals were independent of genotypes*

337 Genotypes located within the windows of *CLDN5* were associated with DNA  
338 methylation (p-value <  $10^{-6}$ ), but not with cognitive trajectory (p-value = 0.4415, Table S16  
339 A). In line, associations of DNA methylation in the *CLDN5* window with cognitive trajectory  
340 were robust to adjustment for genotypes from the same window (Table S16 B).

341 This observation was confirmed by the subsequent analyses on the single CpG / SNP  
342 level, which showed that the CpG sites associated with genotypes were not the same as being  
343 associated with cognitive trajectory (Table S17, Figure 2 and Figures S9 to S12). This  
344 indicates that our methylation signals were not caused by hidden genotype effects.

345

346 *No clear association with gene expression levels*

347 In our sample, we find no association between DNA methylation in the *CLDN5*  
348 window and *CLDN5* expression (p-value = 0.1978; Table S17). *KCNN4* was the only top gene  
349 (Table 2) for which methylation levels were associated with expression levels (p-value =  
350 0.0004; Table S18). Furthermore, cognitive trajectory was not associated with expression of  
351 any gene in Table 2 (Table S18).

352

353 ***Discussion***

354 In this study, we found an epigenome-wide association between brain-tissue-based  
355 DNA methylation in the *CLDN5* locus and cognitive trajectory in more than 600 participants  
356 from the ROS/MAP cohort. This association was significant across different domains and  
357 particularly associated with trajectories in episodic and working memory. We also found that  
358 higher levels of methylation in *CLDN5* were associated with neuropathology in our discovery  
359 and replication datasets consistent with the direction of association found with cognitive  
360 decline. Most interestingly, the association between methylation in *CLDN5* and cognitive  
361 decline was independent of beta-amyloid and neurofibrillary neuropathology and even present  
362 in participants with low levels of those pathologies. In addition, only 13-31% of the  
363 association between methylation and cognitive decline was mediated through levels of  
364 neuropathology, whereas the major part of the association was independent of it. Finally, we

365 found no evidence that hidden effects of genotypes in the *CLDN5* locus confounded our  
366 methylation results.

367 *CLDN5* is an integral membrane protein and an important component of tight junction  
368 protein complexes that comprise the blood-brain barrier. The blood-brain barrier is located at  
369 endothelial cells lining the brain microvasculature and is maintained by the neurovascular  
370 unit, a functional relationship between astrocytes, neurons, and endothelial cells <sup>44</sup>.  
371 Dysfunction of the blood-brain barrier has been implicated in neurodegenerative disorders,  
372 such as AD <sup>44-47</sup>. Thus, our finding that altered regulation of *CLDN5* is associated with  
373 cognitive decline suggests a role of blood-brain barrier dysfunction in cognitive decline. We  
374 note that an estimated two-thirds of AD dementia (clinically defined) and that an estimated  
375 40% of cognitive decline are attributable to known age-related neuropathologies <sup>4,48</sup>. Thus,  
376 our findings may account for some of the unaccounted-for variation in cognitive decline and  
377 AD dementia.

378 This is the first epigenome-wide study using cognitive trajectory in older individuals.  
379 A previous study on the same cohort showed an association of 71 CpG sites with neuritic  
380 plaque burden, of which 11 were validated in an independent cohort<sup>11</sup>. Here, we showed that  
381 all of these 11 signals were at least nominally associated with cognitive trajectory and the  
382 strongest associations were again found for cognitive trajectory of episodic and working  
383 memory (Table S19). In addition, we identified methylation in *CLDN5* as new epigenetic  
384 factor associated with cognitive trajectory, a gene that has not been linked to AD in a  
385 population-based cohort.

386 By contrast, associations of blood-based methylation levels with global cognitive  
387 function (cg21450381) and phonemic verbal fluency (cg12507869) <sup>15</sup> could not be validated  
388 in our study (Table S20). The likely reasons are the different source of methylation data, and



389 differences in the phenotype (i.e., cognitive trajectory over time in our study versus cognitive  
390 testing at a single time point<sup>15</sup>).

391 Strengths of this study include the ROS/MAP cohort as a discovery dataset which is  
392 notable for its longitudinal nature with very high follow-up rates, prospective collection of  
393 data, a community-based cohort design, and detailed neuropathological examination  
394 following high autopsy rates. The validity of our signals was also determined in an  
395 independent replication dataset, and the availability of genomic data allowed us to determine  
396 methylation changes were not the result of hidden genotype effect. This study is also  
397 strengthened by the GAMuT<sup>16</sup> statistical method that harnesses correlations among cognitive  
398 domains and among CpG sites to improve statistical power compared to standard univariate  
399 techniques.

400 The study is potentially limited by its cross-sectional nature. Although brain tissue is  
401 the ideal target tissue to measure DNA methylation related to cognitive trajectory, it inhibited  
402 a simultaneous (or even later) assessment of cognitive function. Consequently, we cannot  
403 exclude the potential risk of reverse causality in our associations. Another potential limitation  
404 is the use of bulk tissue analysis which might obscure signals from different cell populations.  
405 This problem was mitigated in our analysis by adjusting for cell-type composition. However,  
406 the bulk tissue analysis may have obscured an association between *CLDN5* methylation and  
407 RNA expression. Future studies should investigate the role of *CLDN5* in specific cell types  
408 from brain and investigate whether there is a causal relationship between *CLDN5*  
409 dysregulation and cognitive decline in animal models of AD.

410 In conclusion, we have presented evidence for brain-based DNA methylation in  
411 association with cognitive trajectory. We identified methylation in *CLDN5* as a new  
412 epigenetic factor associated with cognitive trajectory, which was validated in an independent  
413 dataset and independent of beta-amyloid and neurofibrillary neuropathology. Higher levels of

414 methylation in *CLDN5* were associated with cognitive decline implicating the blood brain  
415 barrier in maintenance of cognitive trajectory with aging.

416 **Acknowledgments:**

417 The authors are grateful to the participants of the Rush Memory and Aging Project and  
418 Religious Orders Study and the Medical Research Counsel Brain Bank.

419

420 **Author Contributions:**

421 AH planned and conducted the analyses supported by MPE, KC, TSW and APW. AH, TSW,  
422 APW and MPE were the major contributors in writing the manuscript. KC and CR were  
423 responsible for the preprocessing and quality control of the DNA methylation data from the  
424 discovery cohort and RE for the replication cohort. APW conducted the preprocessing and  
425 quality control of the RNAseq data and TSW was supervised the quality control of the  
426 genotype data. PLDJ generated the methylation, transcriptomic, and genetic data. DAB  
427 conceived, designed, and leads the ROS/MAP study and the methylation sub-study.

428

429 **Competing financial interests declaration:**

430 The authors have nothing to declare.

431

432 **Web resources:**

433 Data used in this study: <https://www.synapse.org/#!Synapse:syn2580853>

434 Rush Alzheimer's Disease Center Research Resource Sharing Hub: [www.radc.rush.edu](http://www.radc.rush.edu).

435 Epstein Software: <https://github.com/epstein-software>.

436 MRC London Neurodegenerative Diseases Brain Bank:

437 <https://www.kcl.ac.uk/ioppn/depts/bcn/our-research/neurodegeneration/brain-bank>.

438 Ensembl gene predictions (ensGene, version of Apr-06-2014):

439 <http://hgdownload.soe.ucsc.edu/goldenPath/hg19/database/>.

440 **References**

- 441 1. Batty GD, Deary IJ, Zaninotto P. Association of cognitive function with cause-specific  
442 mortality in middle and older age: Follow-up of participants in the english longitudinal  
443 study of ageing. *Am. J. Epidemiol.* 2016;183(3):183–190.
- 444 2. Van Cauwenberghe C, Van Broeckhoven C, Sleegers K. The genetic landscape of  
445 Alzheimer disease: Clinical implications and perspectives. *Genet. Med.*  
446 2016;18(5):421–430.
- 447 3. Möller HJ, Graeber MB. The case described by Alois Alzheimer in 1911. Historical  
448 and conceptual perspectives based on the clinical record and neurohistological sections.  
449 *Eur. Arch. Psychiatry Clin. Neurosci.* 1998;248(3):111–22.
- 450 4. Boyle PA, Wilson RS, Yu L, et al. Much of late life cognitive decline is not due to  
451 common neurodegenerative pathologies. *Ann. Neurol.* 2013;74(3):478–489.
- 452 5. Boyle PA, Yu L, Wilson RS, et al. Person-specific contribution of neuropathologies to  
453 cognitive loss in old age. *Ann. Neurol.* 2018;83(1):74–83.
- 454 6. Schneider JA, Aggarwal NT, Barnes L, et al. The neuropathology of older persons with  
455 and without dementia from community versus clinic cohorts. *J. Alzheimer’s Dis.*  
456 2009;18(3):691–701.
- 457 7. Terry RD, Masliah E, Salmon DP, et al. Physical basis of cognitive alterations in  
458 Alzheimer’s disease: synapse loss is the major correlate of cognitive impairment. *Ann.*  
459 *Neurol.* 1991;30(4):572–80.
- 460 8. Li P, Marshall L, Oh G, et al. Epigenetic dysregulation of enhancers in neurons is  
461 associated with Alzheimer’s disease pathology and cognitive symptoms. *Nat.*  
462 *Commun.* 2019;10(1):1–14.
- 463 9. Altuna M, Urdániz-Casado A, Sánchez-Ruiz De Gordo J, et al. DNA methylation  
464 signature of human hippocampus in Alzheimer’s disease is linked to neurogenesis.

- 465 Clin. Epigenetics 2019;11(1):1–16.
- 466 10. Lunnon K, Smith R, Hannon E, et al. Methyloomic profiling implicates cortical  
467 deregulation of ANK1 in Alzheimer’s disease. *Nat. Neurosci.* 2014;17(9):1164–70.
- 468 11. De Jager PL, Srivastava G, Lunnon K, et al. Alzheimer’s disease: early alterations in  
469 brain DNA methylation at ANK1, BIN1, RHBDF2 and other loci. *Nat. Neurosci.*  
470 2014;17(9):1156–63.
- 471 12. Humphries CE, Kohli MA, Nathanson L, et al. Integrated whole transcriptome and  
472 DNA methylation analysis identifies gene networks specific to late-onset Alzheimer’s  
473 disease. *J. Alzheimer’s Dis.* 2015;44(3):977–987.
- 474 13. Watson CT, Roussos P, Garg P, et al. Genome-wide DNA methylation profiling in  
475 the superior temporal gyrus reveals epigenetic signatures associated with Alzheimer’s  
476 disease. *Genome Med.* 2016;8(1):1–14.
- 477 14. Bakulski KM, Dolinoy DC, Sartor MA, et al. Genome-wide DNA methylation  
478 differences between late-onset Alzheimer’s disease and cognitively normal controls in  
479 human frontal cortex. *J. Alzheimer’s Dis.* 2012;29(3):571–588.
- 480 15. Marioni RE, McRae AF, Bressler J, et al. Meta-analysis of epigenome-wide association  
481 studies of cognitive abilities. *Mol. Psychiatry* 2018;23(11):2133–2144.
- 482 16. Broadaway KA, Cutler DJ, Duncan R, et al. A Statistical Approach for Testing Cross-  
483 Phenotype Effects of Rare Variants. *Am. J. Hum. Genet.* 2016;98(3):525–540.
- 484 17. Holleman AM, Broadaway KA, Duncan R, et al. Powerful and Efficient Strategies for  
485 Genetic Association Testing of Symptom and Questionnaire Data in Psychiatric  
486 Genetic Studies. *Sci. Rep.* 2019;9(1):1–11.
- 487 18. Bennett DA, Buchman AS, Boyle PA, et al. Religious Orders Study and Rush Memory  
488 and Aging Project. [Internet]. *J. Alzheimer’s Dis.* 2018;64(s1):S161–S189. Available  
489 from: <http://www.ncbi.nlm.nih.gov/pubmed/29865057>

- 490 19. Bennett DA, Wilson RS, Boyle PA, et al. Relation of neuropathology to cognition in  
491 persons without cognitive impairment. *Ann. Neurol.* 2012;72(4):599–609.
- 492 20. Chen Y, Lemire M, Choufani S, et al. Discovery of cross-reactive probes and  
493 polymorphic CpGs in the Illumina Infinium HumanMethylation450 microarray.  
494 *Epigenetics* 2013;8(2):203–9.
- 495 21. Barfield RT, Almli LM, Kilaru V, et al. Accounting for population stratification in  
496 DNA methylation studies. *Genet. Epidemiol.* 2014;38(3):231–241.
- 497 22. Teschendorff AE, Marabita F, Lechner M, et al. A beta-mixture quantile normalization  
498 method for correcting probe design bias in Illumina Infinium 450 k DNA methylation  
499 data. *Bioinformatics* 2013;29(2):189–196.
- 500 23. Leek JT, Johnson WE, Parker HS, et al. The sva package for removing batch effects  
501 and other unwanted variation in high-throughput experiments. *Bioinformatics*  
502 2012;28(6):882–3.
- 503 24. Guintivano J, Aryee MJ, Kaminsky ZA. A cell epigenotype specific model for the  
504 correction of brain cellular heterogeneity bias and its application to age, brain region  
505 and major depression. *Epigenetics* 2013;8(3):290–302.
- 506 25. De Jager PL, Shulman JM, Chibnik LB, et al. A genome-wide scan for common  
507 variants affecting the rate of age-related cognitive decline. *Neurobiol. Aging*  
508 2012;33(5):1017.e1–15.
- 509 26. Das S, Forer L, Schönherr S, et al. Next-generation genotype imputation service and  
510 methods. *Nat. Genet.* 2016;48(10):1284–1287.
- 511 27. Dobin A, Davis CA, Schlesinger F, et al. STAR: ultrafast universal RNA-seq aligner.  
512 *Bioinformatics* 2013;29(1):15–21.
- 513 28. Love MI, Huber W, Anders S. Moderated estimation of fold change and dispersion for  
514 RNA-seq data with DESeq2. *Genome Biol.* 2014;15(12):550.

- 515 29. Newman AM, Liu CL, Green MR, et al. Robust enumeration of cell subsets from tissue  
516 expression profiles. *Nat. Methods* 2015;12(5):453–7.
- 517 30. Darmanis S, Sloan SA, Zhang Y, et al. A survey of human brain transcriptome  
518 diversity at the single cell level. *Proc. Natl. Acad. Sci. U. S. A.* 2015;112(23):7285–90.
- 519 31. Bennett DA, Schneider JA, Arvanitakis Z, Wilson RS. Overview and findings from the  
520 religious orders study. *Curr. Alzheimer Res.* 2012;9(6):628–45.
- 521 32. Bennett DA, Schneider JA, Buchman AS, et al. Overview and findings from the rush  
522 memory and aging project. *Curr. Alzheimer Res.* 2012;9(6):646–663.
- 523 33. Braak H, Braak E. Neuropathological staging of Alzheimer-related changes. *Acta*  
524 *Neuropathol* 1991;82:239–259.
- 525 34. Malani N. hiAnnotator: Functions for annotating GRanges objects. Version 1.12.0.  
526 2017;
- 527 35. Paaajanen T, Hänninen T, Tunnard C, et al. CERAD neuropsychological compound  
528 scores are accurate in detecting prodromal alzheimer’s disease: A prospective  
529 AddNeuroMed study. *J. Alzheimer’s Dis.* 2014;39(3):679–690.
- 530 36. Larson NB, Chen J, Schaid DJ. A review of kernel methods for genetic association  
531 studies. *Genet. Epidemiol.* 2019;43(2):122–136.
- 532 37. Wu MC, Lee S, Cai T, et al. Rare-variant association testing for sequencing data with  
533 the sequence kernel association test. *Am. J. Hum. Genet.* 2011;89(1):82–93.
- 534 38. Davies RB. Algorithm AS 155: The Distribution of a Linear Combination of  $\chi^2$   
535 Random Variables. *J. R. Stat. Soc. Ser. C Appl. Stat.* 1980;29(3):323–333.
- 536 39. Tingley D, Yamamoto T, Hirose K, et al. mediation: R Package for Causal Mediation  
537 Analysis. *J. Stat. Softw.* 2014;59(5):1–38.
- 538 40. Imai K, Keele L, Tingley D. A general approach to causal mediation analysis. *Psychol.*  
539 *Methods* 2010;15(4):309–34.

- 540 41. Ikram MA, VanderWeele TJ. A proposed clinical and biological interpretation of  
541 mediated interaction. *Eur. J. Epidemiol.* 2015;30(10):1115–1118.
- 542 42. Valeri L, Vanderweele TJ. Mediation analysis allowing for exposure-mediator  
543 interactions and causal interpretation: theoretical assumptions and implementation with  
544 SAS and SPSS macros. *Psychol. Methods* 2013;18(2):137–50.
- 545 43. Martin TC, Yet I, Tsai PC, Bell JT. coMET: Visualisation of regional epigenome-wide  
546 association scan results and DNA co-methylation patterns. *BMC Bioinformatics*  
547 2015;16(1):1–5.
- 548 44. Marques F, Sousa JC, Sousa N, Palha JA. Blood-brain-barriers in aging and in  
549 Alzheimer’s disease. *Mol. Neurodegener.* 2013;8:38.
- 550 45. Farrall AJ, Wardlaw JM. Blood-brain barrier: ageing and microvascular disease--  
551 systematic review and meta-analysis. *Neurobiol. Aging* 2009;30(3):337–52.
- 552 46. Viggars AP, Wharton SB, Simpson JE, et al. Alterations in the blood brain barrier in  
553 ageing cerebral cortex in relationship to Alzheimer-type pathology: a study in the  
554 MRC-CFAS population neuropathology cohort. *Neurosci. Lett.* 2011;505(1):25–30.
- 555 47. Weiss N, Miller F, Cazaubon S, Couraud P-O. The blood-brain barrier in brain  
556 homeostasis and neurological diseases. *Biochim. Biophys. Acta* 2009;1788(4):842–57.
- 557 48. Boyle PA, Yu L, Leurgans SE, et al. Attributable risk of Alzheimer’s dementia  
558 attributed to age-related neuropathologies. *Ann. Neurol.* 2019;85(1):114–124.
- 559



## Tables

**Table 1.** Study characteristics of the discovery (ROS/MAP) and replication datasets.

|                                                  | Discovery Dataset | Replication Dataset |
|--------------------------------------------------|-------------------|---------------------|
| N                                                | 636               | 66                  |
| Age at death, mean $\pm$ sd                      | 86.22 $\pm$ 4.72  | 87.48 $\pm$ 6.57    |
| Female, n (%)                                    | 401 (63.1%)       | 44 (66.67%)         |
| Ancestry                                         |                   |                     |
| European, n (%)                                  | 621 (97.6%)       | <i>n.a.</i>         |
| African American, n (%)                          | 11 (1.7%)         | <i>n.a.</i>         |
| Native American, n (%)                           | 1 (0.2%)          | <i>n.a.</i>         |
| Asian, n (%)                                     | 3 (0.5%)          | <i>n.a.</i>         |
| Years of education, mean $\pm$ sd                | 16.63 $\pm$ 3.54  | <i>n.a.</i>         |
| Never smoker, n (%)                              | 444 (69.8%)       | <i>n.a.</i>         |
| Ex-smoker, n (%)                                 | 176 (27.7%)       | <i>n.a.</i>         |
| Smoker, n (%)                                    | 16 (2.5%)         | <i>n.a.</i>         |
| Post mortem interval (PMI), mean $\pm$ sd        | 7.43 $\pm$ 5.79   | <i>n.a.</i>         |
| Decline in episodic memory, mean $\pm$ sd        | -0.03 $\pm$ 0.11  | <i>n.a.</i>         |
| Decline in perceptual speed, mean $\pm$ sd       | -0.02 $\pm$ 0.08  | <i>n.a.</i>         |
| Decline in perceptual orientation, mean $\pm$ sd | -0.01 $\pm$ 0.04  | <i>n.a.</i>         |
| Decline in semantic memory, mean $\pm$ sd        | -0.03 $\pm$ 0.13  | <i>n.a.</i>         |
| Decline in working memory, mean $\pm$ sd         | -0.01 $\pm$ 0.05  | <i>n.a.</i>         |
| CERAD, mean $\pm$ sd                             | 2.27 $\pm$ 1.15   | <i>n.a.</i>         |
| Braak stage, mean $\pm$ sd                       | 3.44 $\pm$ 1.26   | 4.70 $\pm$ 1.62     |

*n.a.*: information not available in replication dataset.

**Table 2.** Top signals (p-values  $< 5 \times 10^{-5}$ ) for the association between DNA methylation and cognitive decline across all domains as well as in the single domains in the discovery dataset (ROS/MAP).

| gene          | chr   | pos (lower) | pos (upper) | mean dist gene | max dist gene | #CpG sites | p-value (across all domains) | p-value (EM)    | p-value (PS)    | p-value (PO) | p-value (SM)    | p-value (WM)    |
|---------------|-------|-------------|-------------|----------------|---------------|------------|------------------------------|-----------------|-----------------|--------------|-----------------|-----------------|
| CLDN5         | chr22 | 19510877    | 19515608    | 1030           | 2062          | 18         | <b>9.96E-07</b>              | <u>4.65E-06</u> | 7.16E-05        | 0.0021       | <u>2.35E-05</u> | <b>2.54E-07</b> |
| AC084018.1    | chr12 | 122235169   | 122241475   | 501            | 1414          | 15         | <u>2.84E-06</u>              | 5.96E-05        | 0.0001          | 0.0060       | <u>4.13E-06</u> | 0.0002          |
| CTB-186G2.1   | chr19 | 39087135    | 39090701    | 692            | 1633          | 4          | <u>6.19E-06</u>              | <u>7.33E-06</u> | <u>3.50E-05</u> | 0.0015       | 7.45E-05        | 7.69E-05        |
| ATG16L2       | chr11 | 72521478    | 72546168    | 1326           | 12094         | 25         | <u>8.22E-06</u>              | <u>1.32E-05</u> | 0.0002          | 0.0086       | 8.31E-05        | 0.0004          |
| KCNN4         | chr19 | 44270892    | 44286076    | 1682           | 6854          | 13         | <u>1.01E-05</u>              | <u>2.01E-05</u> | 0.0002          | 0.0127       | 0.0001          | <u>4.12E-05</u> |
| RP11-779O18.1 | chr5  | 172168177   | 172189374   | 7685           | 17051         | 12         | <u>1.86E-05</u>              | <u>1.26E-05</u> | 0.0002          | 0.0262       | 0.0009          | <u>3.18E-06</u> |
| TTC22         | chr1  | 55240609    | 55268659    | 1189           | 4775          | 23         | <u>3.42E-05</u>              | 0.000192        | 0.0002          | 0.0182       | 0.0002          | 6.16E-05        |
| DCUN1D2-AS    | chr13 | 114123258   | 114129580   | 2530           | 3583          | 10         | <u>3.87E-05</u>              | <u>5.91E-06</u> | 0.0004          | 0.0176       | 0.0014          | <u>4.48E-05</u> |
| PNMA1         | chr14 | 74177136    | 74181427    | 777            | 1357          | 9          | <u>3.88E-05</u>              | <u>3.14E-05</u> | 0.0079          | 0.0030       | 0.0002          | 0.0006          |
| RP11-101C11.1 | chr1  | 55682652    | 55709508    | 5270           | 9658          | 2          | <u>3.99E-05</u>              | <u>2.36E-05</u> | 0.0004          | 0.0565       | 0.0006          | 0.0003          |

EM: decline in episodic memory; PS: decline in perceptual speed; PO: decline in perceptual orientation; SM: decline in semantic memory; WM: decline in working memory

Adjusted for age at death, education, sex, ancestry, smoking status, post-mortem interval (PMI) and the first three principal components (PCs).

Bonferroni threshold:  $0.05/26,558=1.88 \times 10^{-6}$  (p-values below Bonferroni threshold in **bold**)

Suggestive: p-values  $< 5 \times 10^{-5}$  (underlined)

**Table 3.** Validation of ROS/MAP (discovery dataset) findings in replication dataset

| gene          | chr   | pos (lower) | pos (upper) | Discovery Dataset |                           |               |                 | Replication Dataset |               |                                                |
|---------------|-------|-------------|-------------|-------------------|---------------------------|---------------|-----------------|---------------------|---------------|------------------------------------------------|
|               |       |             |             | #CpG sites        | p-value cognitive decline | p-value CERAD | p-value Braak   | #CpG sites          | p-value Braak | p-value Braak (permutation Test <sup>1</sup> ) |
| CLDN5         | chr22 | 19510877    | 19515608    | 18                | 9.96E-07                  | <b>0.0023</b> | <b>0.0066</b>   | 18                  | <b>0.0088</b> | <b>0.0076</b>                                  |
| AC084018.1    | chr12 | 122235169   | 122241475   | 15                | 2.84E-06                  | <b>0.0002</b> | <b>5.31E-06</b> | 16                  | 0.1794        | 0.1791                                         |
| CTB-186G2.1   | chr19 | 39087135    | 39090701    | 4                 | 6.19E-06                  | <b>0.0005</b> | <b>8.36E-05</b> | 4                   | <b>0.0125</b> | <b>0.0121</b>                                  |
| ATG16L2       | chr11 | 72521478    | 72546168    | 25                | 8.22E-06                  | <b>0.0003</b> | <b>5.67E-06</b> | 25                  | 0.1535        | 0.1536                                         |
| KCNN4         | chr19 | 44270892    | 44286076    | 13                | 1.01E-05                  | <b>0.0028</b> | <b>0.0001</b>   | 15                  | <b>0.0222</b> | <b>0.0178</b>                                  |
| RP11-779O18.1 | chr5  | 172168177   | 172189374   | 12                | 1.86E-05                  | <b>0.0168</b> | <b>0.0008</b>   | 12                  | 0.0890        | 0.0872                                         |
| TTC22         | chr1  | 55240609    | 55268659    | 23                | 3.42E-05                  | <b>0.0010</b> | <b>0.0002</b>   | 24                  | 0.2027        | 0.2096                                         |
| DCUN1D2-AS    | chr13 | 114123258   | 114129580   | 10                | 3.87E-05                  | <b>0.0363</b> | <b>0.0344</b>   | 11                  | 0.6988        | 0.7057                                         |
| PNMA1         | chr14 | 74177136    | 74181427    | 9                 | 3.88E-05                  | 0.0709        | 0.1913          | 10                  | 0.1022        | 0.0999                                         |
| RP11-101C11.1 | chr1  | 55682652    | 55709508    | 2                 | 3.99E-05                  | 0.1052        | 0.0831          | 2                   | 0.1582        | 0.1654                                         |

Discovery dataset: ROS/MAP samples. All analyses were adjusted for age at death, education, sex, ancestry, smoking status, post-mortem interval (PMI) and the first three principal components (PCs). Associations with CERAD were additionally adjusted for cell type proportions and the fourth PC.

Replication dataset: MRC Brain Bank Samples (Lunnon et al., 2014) All analyses were adjusted for age at death, sex and cell type composition.

Successful replication (p-value < 0.05 in validation cohort) in **bold**.

<sup>1</sup>Due to the small sample size (N=66) we conducted a permutation test with 10,000 replications in addition to the Davies' approximation to verify the p-values in the validation cohort.

**Table 4.** Identification of lead signals within *CLDN5* and direction of associations.

| gene  | chr   | pos      | CpG site   | beta<br>(EM) | p-value<br>(EM) | beta<br>(PS) | p-value<br>(PS) | beta<br>(PO) | p-value<br>(PO) | beta<br>(SM) | p-value<br>(SM) | beta<br>(WM) | p-value<br>(WM) |
|-------|-------|----------|------------|--------------|-----------------|--------------|-----------------|--------------|-----------------|--------------|-----------------|--------------|-----------------|
| CLDN5 | chr22 | 19512903 | cg05460329 | -0.93        | 1.43E-06        | -0.62        | 1.60E-05        | -0.25        | 0.0003          | -1.10        | 1.89E-06        | -0.45        | 2.41E-06        |
| CLDN5 | chr22 | 19512942 | cg05498726 | -0.55        | 0.0001          | -0.36        | 0.0008          | -0.13        | 0.0162          | -0.61        | 0.0005          | -0.26        | 0.0002          |
| CLDN5 | chr22 | 19513006 | cg11450827 | -0.60        | 0.0007          | -0.35        | 0.0064          | -0.16        | 0.0111          | -0.65        | 0.0019          | -0.30        | 0.0005          |
| CLDN5 | chr22 | 19513008 | cg17583256 | -0.57        | 0.0005          | -0.30        | 0.0129          | -0.14        | 0.0180          | -0.51        | 0.0086          | -0.27        | 0.0008          |
| CLDN5 | chr22 | 19513017 | cg16773741 | -0.76        | <b>1.48E-08</b> | -0.39        | 8.38E-05        | -0.18        | 0.0003          | -0.86        | <b>8.81E-08</b> | -0.38        | <b>8.66E-09</b> |
| CLDN5 | chr22 | 19513078 | cg14553765 | -0.44        | 0.0014          | -0.32        | 0.0017          | -0.13        | 0.0087          | -0.60        | 0.0003          | -0.29        | 1.92E-05        |
| CLDN5 | chr22 | 19513176 | cg00189989 | -0.61        | 0.0004          | -0.42        | 0.0009          | -0.14        | 0.0224          | -0.78        | 0.0001          | -0.36        | 1.86E-05        |

Only CpG sites with a p-value < 0.001 for at least one cognitive domain are shown. Bonferroni threshold: 0.05/338,036=1.48e-07 (p-values below Bonferroni threshold in bold). EM: decline in episodic memory; PS: decline in perceptual speed; PO: decline in perceptual orientation; SM: decline in semantic memory; WM: decline in working memory. Adjusted for age at death, education, sex, ancestry, smoking status, post-mortem interval (PMI) and the first four principal components.

1 **Figure Legends**

2

3 **Figure 1. DNA methylation and cognitive decline.** Association between DNA methylation  
4 and cognitive decline in ROS/MAP (discovery dataset) tested with GAMuT. Adjusted for age  
5 at death, education, sex, ancestry, smoking status, post-mortem interval (PMI) and the first  
6 three principal components.

7

8 **Figure 2. Fine mapping of the association between DNA methylation and decline in**  
9 **working memory.** Results from linear regression analyses on the association between CpG  
10 sites and cognitive decline in ROS/MAP (discovery dataset) adjusted for age at death,  
11 education, sex, ancestry, smoking status, post-mortem interval (PMI) and the first four  
12 principal components. The most significant CpG site (cg16773741) is marked in purple and  
13 CpG sites associated with genotypes in the same window are marked in yellow (compare  
14 Table S17).

15

16 **Figure 3. Interaction analysis.** Associations between DNA methylation of the top CpG site  
17 of *CLDN5* (cg16773741) and cognitive trajectory are shown in participants with no to little  
18 (category 0) vs. moderate to severe (category 1) signs of neuropathology. No to little signs of  
19 neuropathology are defined as a CERAD measure of 3 (possible) or 4 (no AD) or a Braak  
20 stage of 0 to II. Moderate to severe signs of neuropathology are defined as a CERAD measure  
21 of 1 (definite) or 2 (probable) or a Braak stage of III to VI. P-values are given for the test of  
22 deviations of the association between methylation in cognitive trajectory between the two  
23 strata. The bars present the distribution of the neuropathological variables. EM: decline in  
24 episodic memory; PS: decline in perceptual speed; PO: decline in perceptual orientation; SM:  
25 decline in semantic memory; WM: decline in working memory. Adjusted for age at death,  
26 education, sex, ancestry, smoking status, post-mortem interval (PMI) and the first three  
27 principal components.

28

29 **Figure 4. Causal mediation analysis.** Beta-estimates and 95%-confidence intervals of the  
30 estimated average causal mediation effects, the average direct effects as well as the total  
31 effects. Proportion (with 95%-confidence interval) of the association between DNA  
32 methylation (DNAm) of the top CpG site of *CLDN5* (cg16773741) and cognitive trajectory,  
33 which is mediated through neuropathology (CERAD & Braak stage) is given in percent. EM:  
34 decline in episodic memory; PS: decline in perceptual speed; PO: decline in perceptual  
35 orientation; SM: decline in semantic memory; WM: decline in working memory. Adjusted for  
36 age at death, education, sex, ancestry, smoking status, post-mortem interval (PMI) and the  
37 first three principal components (PCs).

38

**A. Manhattan Plot**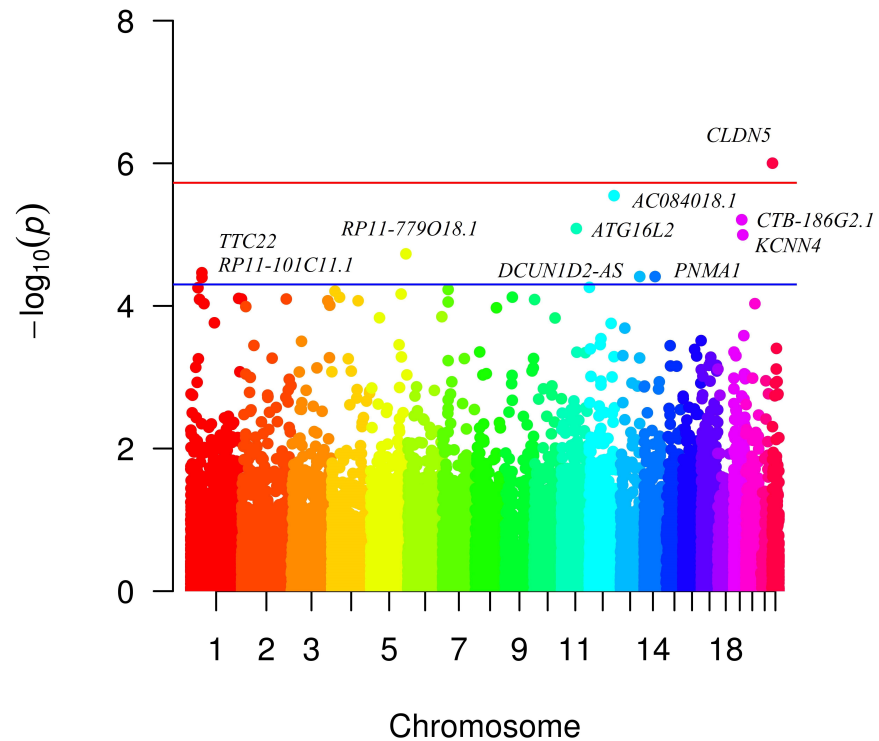**B. Q-Q-Plot**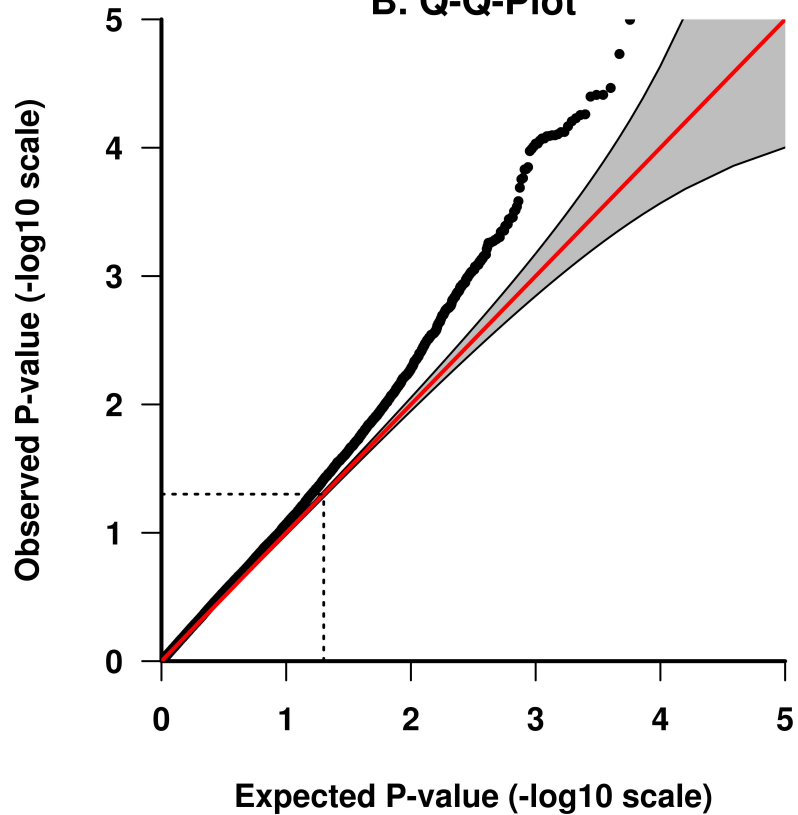

# CLDN5

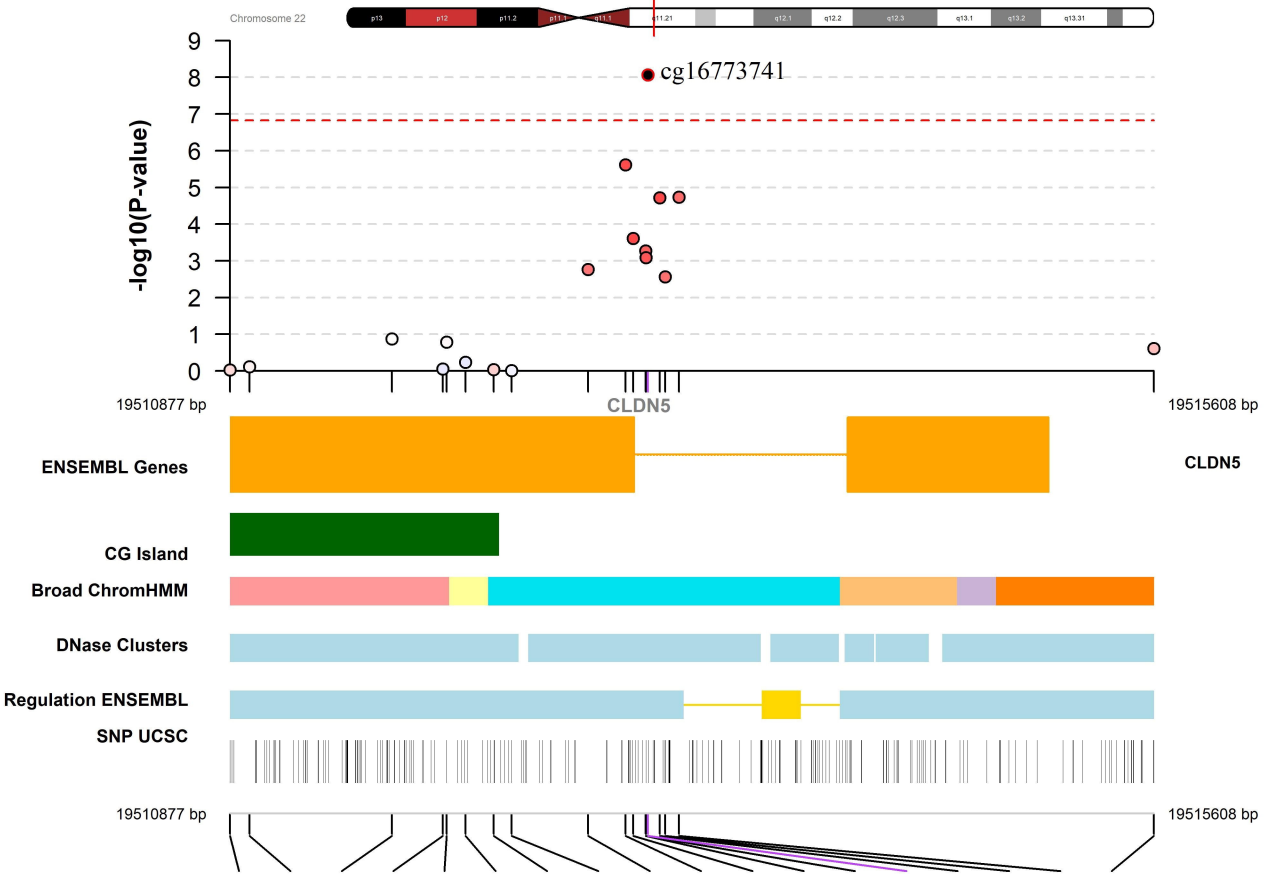

cg17411190
cg21872764
cg00811132
cg17577122
cg09092054
cg06315607
cg20486569
cg09446908
cg04463638
cg05460329
cg05498726
cg11450827
cg17583256
cg16773741
cg14553765
cg06340942
cg00189989
cg12391945

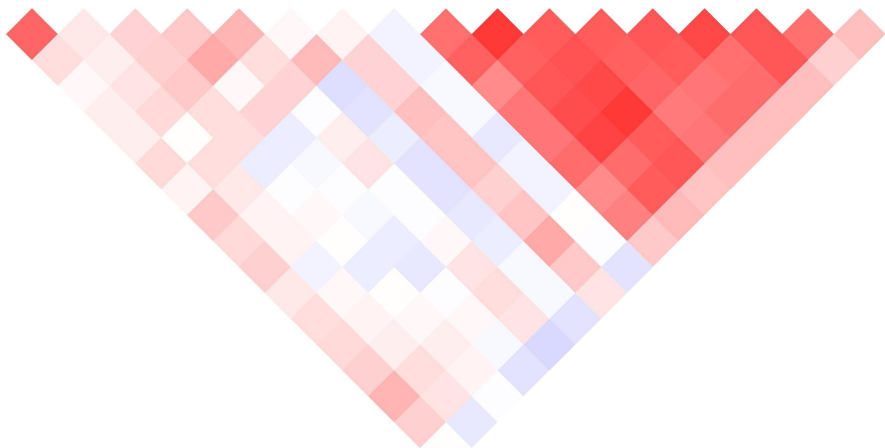

Physical Distance: 4.7 kb

Correlation Matrix Map Type: Spearman

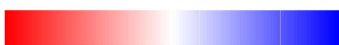

1 0.6 0.2 -0.2 -0.6 -1

● CpG  
● cg16773741

**A) CERAD & EM**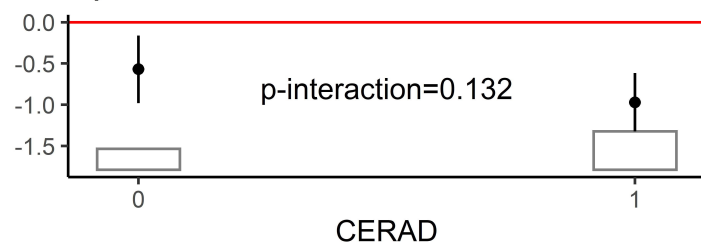**B) Braak stage & EM**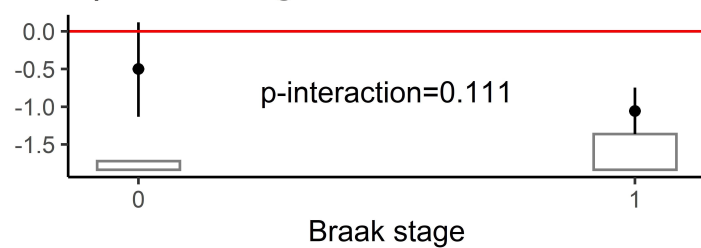**C) CERAD & PS**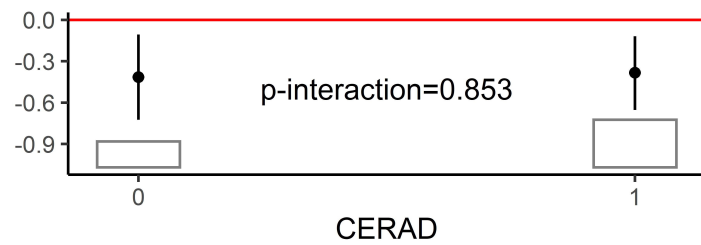**D) Braak stage & PS**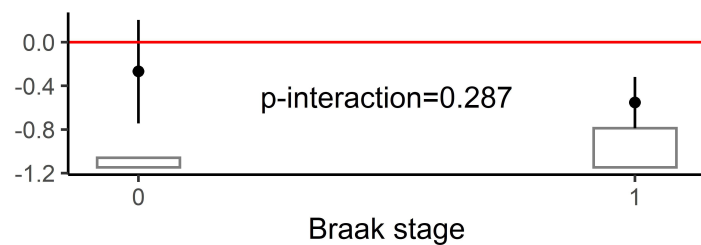**E) CERAD & PO**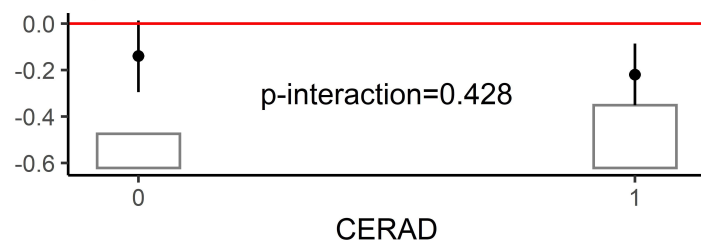**F) Braak stage & PO**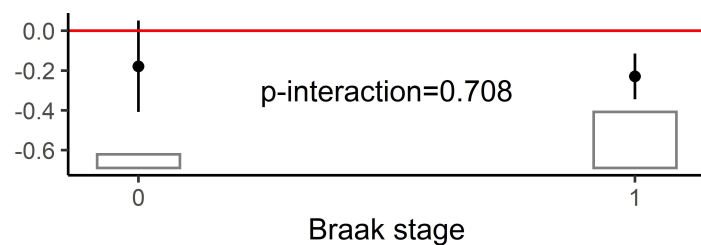**G) CERAD & SM**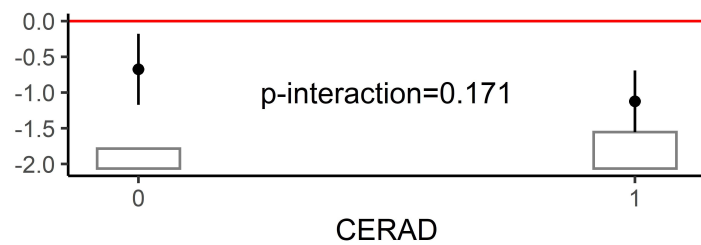**H) Braak stage & SM**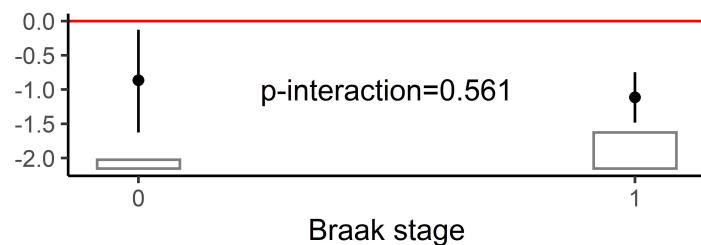**I) CERAD & WM**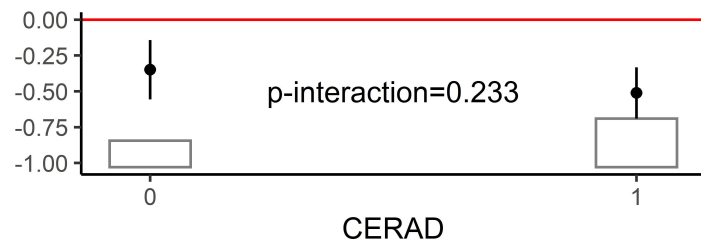**J) Braak stage & WM**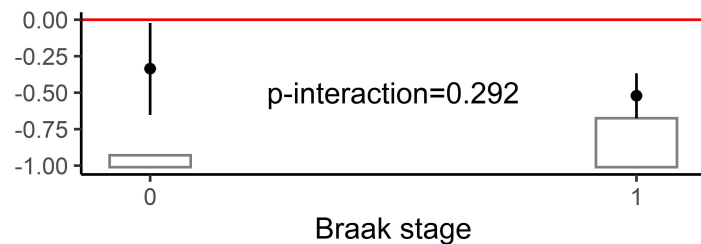



### TOTAL-EFFECT MODEL

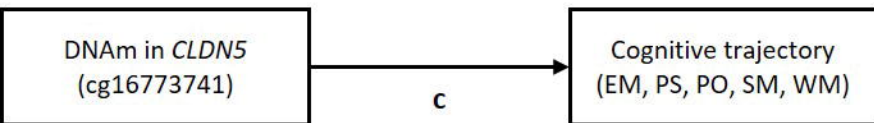

### MEDIATION MODEL

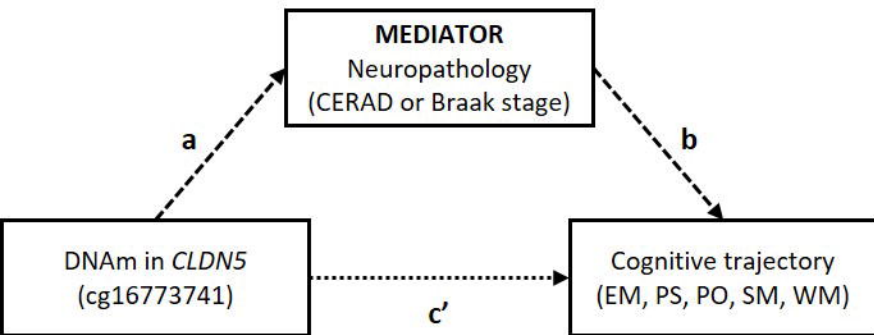

- > Indirect or mediated effect ( $ab$ )
- .....> Direct effect  $c'$  (effect of the mediator removed)
- > Total effect ( $c = c' + ab$ )

### A) CERAD & EM

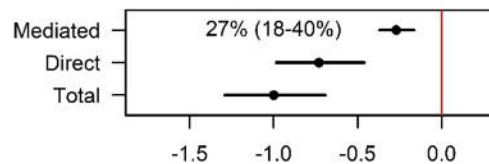

### B) Braak stage & EM

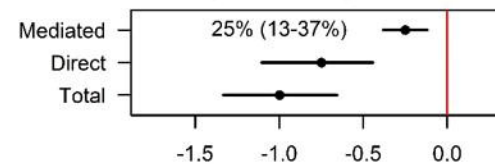

### C) CERAD & PS

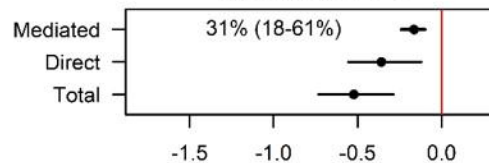

### D) Braak stage & PS

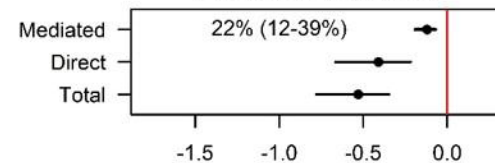

### E) CERAD & PO

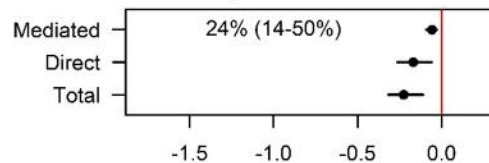

### F) Braak stage & PO

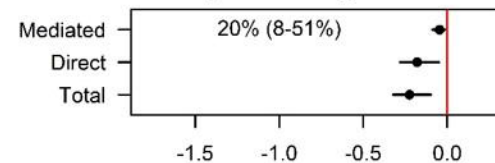

### G) CERAD & SM

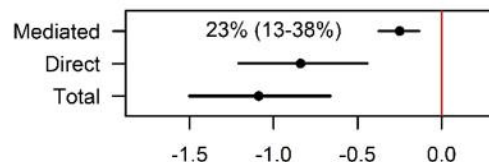

### H) Braak stage & SM

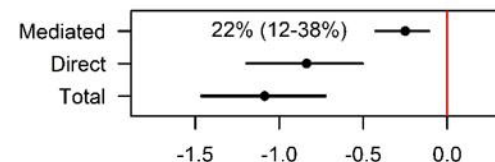

### I) CERAD & WM

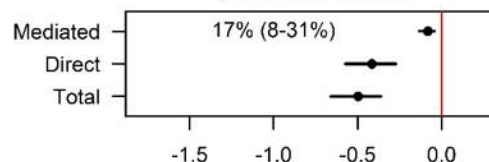

### J) Braak stage & WM

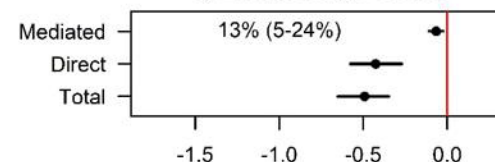

Source: https://www.biorxiv.org/content/10.1101/857953v1.full.pdf
